# Supplementary material for: Risks of ischaemic heart disease and stroke in meat eaters, fish eaters, and vegetarians over 18 years of follow-up: results from the prospective EPIC-Oxford study
Source: BMJ. 2019 Sep 4;366:l4897. doi: 10.1136/bmj.l4897 (PMC6724406; doi:10.1136/bmj.l4897)
Supplement: Supplementary file 1 — Web appendix: Supplementary material [file tont046481.ww.pdf]

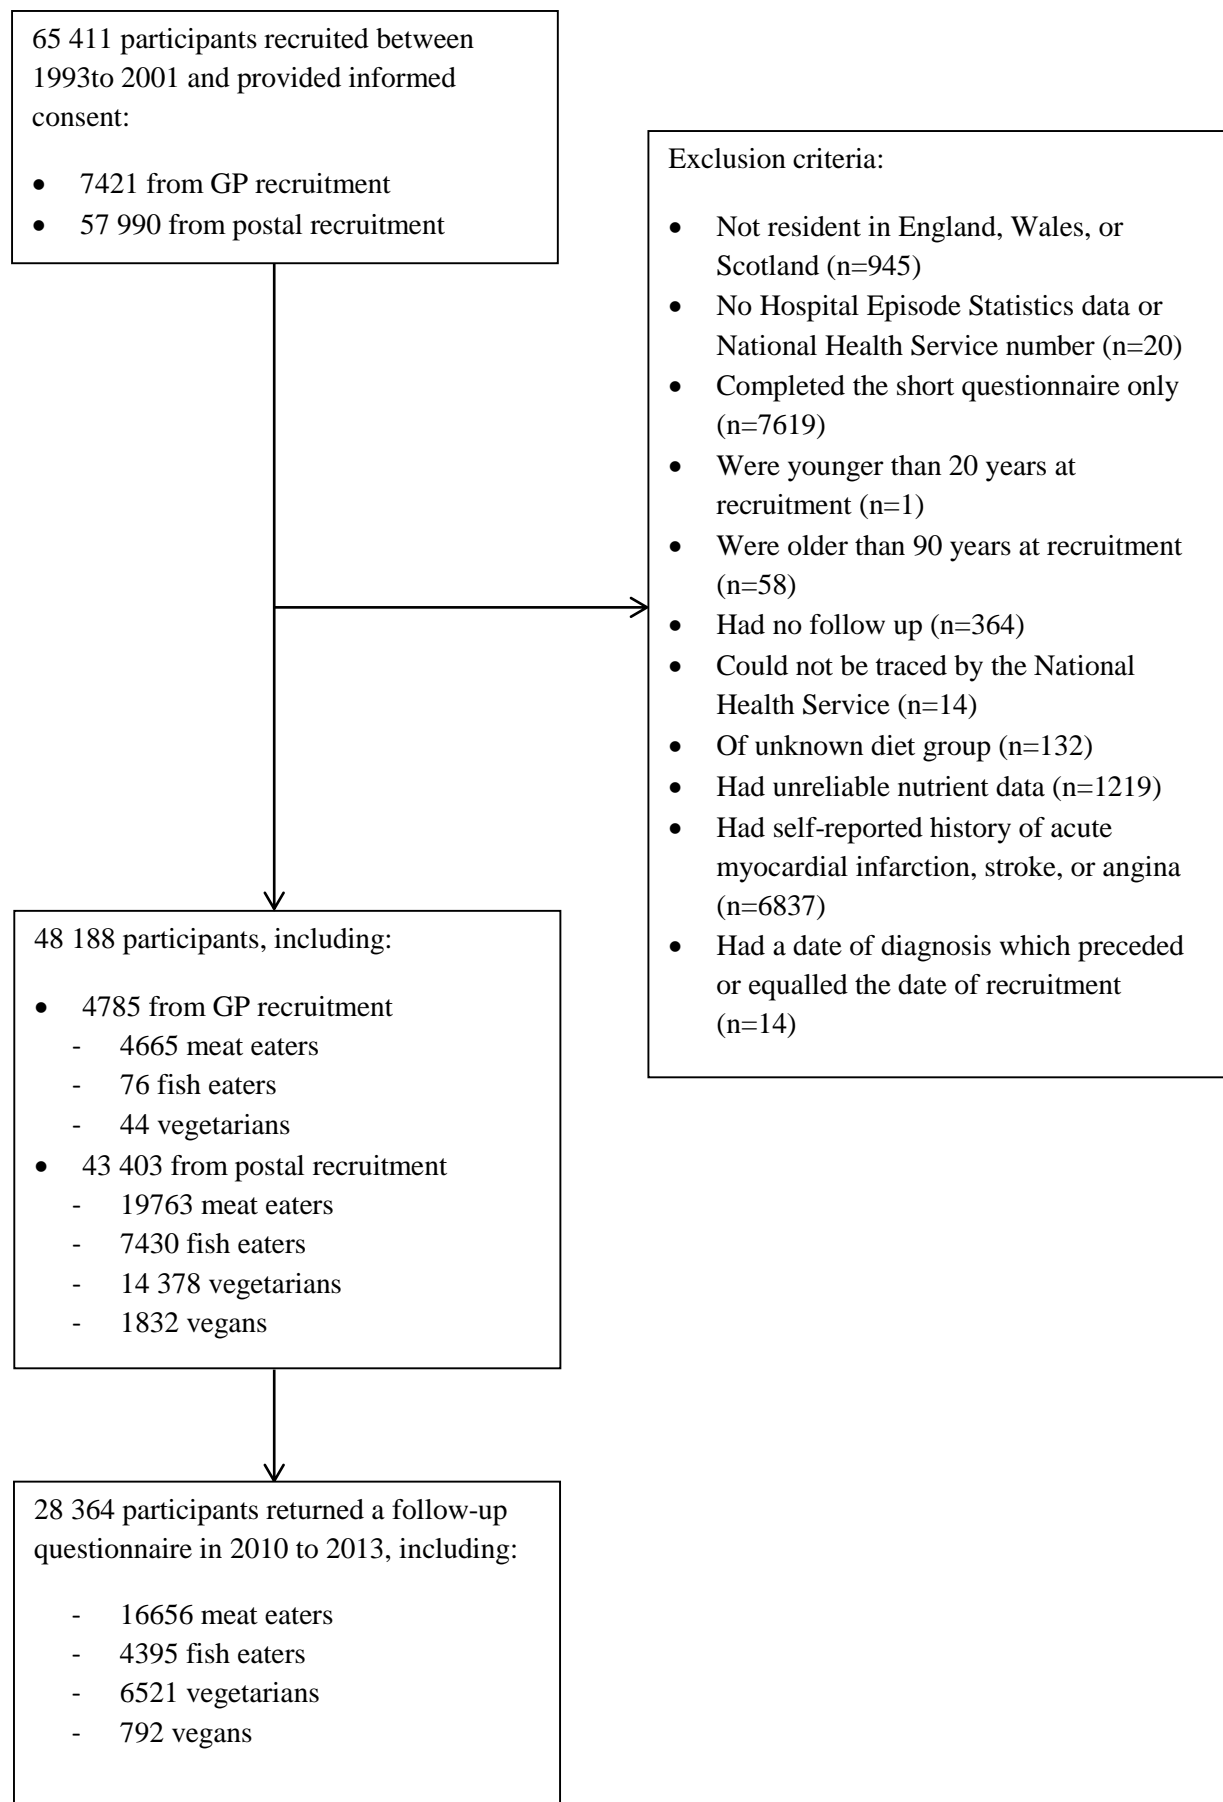

**Supplementary figure 1:** Participant flow chart of the study.

**Supplementary table 1:** Baseline characteristics of the overall cohort, and vegetarians and vegans in EPIC-Oxford.

| Characteristics                                       | Overall cohort<br>Max n=48 188 | Diet groups                 |                        |
|-------------------------------------------------------|--------------------------------|-----------------------------|------------------------|
|                                                       |                                | Vegetarians<br>Max n=14 422 | Vegans<br>Max n=1832   |
| Socio-demographic                                     |                                |                             |                        |
| Age, years (SD)                                       | 44.7 (13.8)                    | 39.5 (13.1)                 | 38.6 (13.2)            |
| Sex, women (%)                                        | 36 899 (76.6)                  | 11 063 (76.7)               | 1169 (63.8)            |
| Top socio-economic quartile (%) <sup>I</sup>          | 10 408 (24.7)                  | 2728 (21.6)                 | 290 (18.0)             |
| Degree education (%)                                  | 17 380 (38.5)                  | 5949 (43.3)                 | 749 (43.3)             |
| Lifestyle                                             |                                |                             |                        |
| Current smokers (%)                                   | 5404 (11.2)                    | 1484 (10.3)                 | 201 (11.0)             |
| Alcohol consumption, g/day (SD)                       | 9.8 (12.8)                     | 9.4 (12.7)                  | 8.5 (13.7)             |
| Moderate/ high physical activity (%)                  | 15 285 (35.6)                  | 5088 (39.3)                 | 761 (45.9)             |
| Dietary supplement use, (%) <sup>2</sup>              | 26 958 (57.1)                  | 8026 (56.6)                 | 935 (52.1)             |
| Medical history, n (%)                                |                                |                             |                        |
| Prior high blood pressure (% yes)                     | 4422 (9.2)                     | 850 (5.9)                   | 85 (4.6)               |
| Prior high blood cholesterol (% yes)                  | 2216 (4.6)                     | 317 (2.2)                   | 28 (1.6)               |
| Prior diabetes (% yes)                                | 507 (1.1)                      | 86 (0.6)                    | 7 (0.4)                |
| Receiving long term treatment for any illness (% yes) | 11 721 (24.6)                  | 2778 (19.4)                 | 299 (16.4)             |
| Oral contraceptive use (% yes) <sup>3</sup>           | 27 842 (75.8)                  | 8791 (79.8)                 | 829 (71.2)             |
| Hormone replacement therapy use (% yes) <sup>3</sup>  | 6166 (16.9)                    | 887 (8.1)                   | 67 (5.9)               |
| Biological measurements, mean (95% CI) <sup>4</sup>   |                                |                             |                        |
| Body mass index (kg/m <sup>2</sup> )                  | ---                            | 23.1 (23.1 to 23.2)         | 22.3 (22.1 to 22.5)    |
| Systolic blood pressure (mmHg)                        | ---                            | 124.0 (123.5 to 124.6)      | 121.7 (120.5 to 123.0) |
| Diastolic blood pressure (mmHg)                       | ---                            | 76.1 (75.8 to 76.5)         | 74.4 (73.6 to 75.2)    |
| Total cholesterol (mmol/L)                            | ---                            | 5.10 (5.03 to 5.17)         | 4.76 (4.67 to 4.85)    |
| HDL cholesterol (mmol/L)                              | ---                            | 1.30 (1.27 to 1.32)         | 1.29 (1.25 to 1.32)    |
| Non-HDL cholesterol (mmol/L)                          | ---                            | 3.80 (3.73 to 3.87)         | 3.47 (3.38 to 3.56)    |

Estimates shown are mean (SD), n (%), or adjusted means (95% confidence interval), as stated in left column.

<sup>1</sup> Based on Townsend index.

<sup>2</sup> Defined as regularly taking any vitamins, minerals, fish oils, fibre or other food supplements during the last 12 months.

<sup>3</sup> In women only.

<sup>4</sup> Body mass index was based on self-reported measures in the whole cohort. Blood lipids were measured in 674 vegetarians and 435 vegans, and blood pressure was measured in 3688 vegetarians and 676 vegans. Estimates were adjusted for the cross-stratification of gender and age at entry (5 year age groups), alcohol consumption (<1g, 1-7g, 8-15g, 16+ g/day), and physical activity (inactive, low activity, moderately active, very active, unknown).

**Supplementary table 2:** Food and nutrient intakes of vegetarians and vegans in EPIC-Oxford.

| Foods or nutrients             | Diet groups                 |                      |
|--------------------------------|-----------------------------|----------------------|
|                                | Vegetarians<br>Max n=14 422 | Vegans<br>Max n=1832 |
| <b>Foods</b>                   |                             |                      |
| Dairy milk (ml/day)            | 260.6 (202.3)               | ---                  |
| Soya milk (ml/day)             | 32.7 (98.1)                 | 228.4 (189.7)        |
| Dairy cheese (g/day)           | 30.0 (25.1)                 | ---                  |
| Total fresh fruit (g/day)      | 275.8 (221.0)               | 346.2 (345.1)        |
| Total vegetables (g/day)       | 288.0 (157.8)               | 345.1 (193.4)        |
| Legumes and soya foods (g/day) | 70.6 (54.9)                 | 104.7 (72.2)         |
| Nuts and nut butter (g/day)    | 9.4 (13.9)                  | 20.0 (26.5)          |
| <b>Nutrients</b>               |                             |                      |
| Carbohydrates (% energy)       | 52.5 (6.6)                  | 55.4 (7.8)           |
| Protein (% energy)             | 13.6 (2.1)                  | 13.3 (2.3)           |
| Total fat (% energy)           | 30.5 (6.5)                  | 28.1 (7.3)           |
| Saturated fat (% energy)       | 10.7 (3.4)                  | 6.5 (2.1)            |
| Monounsaturated fat (% energy) | 9.7 (2.5)                   | 9.4 (3.4)            |
| Polyunsaturated fat (% energy) | 6.8 (2.3)                   | 9.1 (2.9)            |
| Dietary fibre (g/day)          | 21.6 (7.7)                  | 25.9 (9.3)           |
| Sodium (mg/day)                | 2673 (871)                  | 2593 (986)           |
| <b>Total energy (kJ/day)</b>   | <b>7871 (2213)</b>          | <b>7359 (2346)</b>   |

Estimates shown are mean (SD).

**Supplementary table 3.** Prospective associations between 4 diet groups and risk of cardiovascular diseases in EPIC-Oxford (n=48,188).

| Outcome and diet groups     | Cases | Person-years | Hazard ratios (95% confidence intervals) <sup>1</sup> | P-heterogeneity <sup>2</sup> |
|-----------------------------|-------|--------------|-------------------------------------------------------|------------------------------|
| Acute myocardial infarction |       |              |                                                       |                              |
| Meat eaters <sup>3</sup>    | 559   | 438,001      | Reference                                             | 0.63                         |
| Fish eaters <sup>3</sup>    | 84    | 132,168      | 1.00 (0.78 to 1.26)                                   |                              |
| Vegetarians                 | 129   | 246,889      | 0.91 (0.74 to 1.12)                                   |                              |
| Vegans                      | 16    | 31,911       | 0.77 (0.46 to 1.27)                                   |                              |
| Ischaemic heart disease     |       |              |                                                       |                              |
| Meat eaters <sup>3</sup>    | 2026  | 429,125      | Reference                                             | <0.001                       |
| Fish eaters <sup>3</sup>    | 298   | 130,816      | 0.87 (0.77 to 0.99)                                   |                              |
| Vegetarians                 | 429   | 245,309      | 0.77 (0.69 to 0.86)                                   |                              |
| Vegans                      | 67    | 31,629       | 0.82 (0.64 to 1.05)                                   |                              |
| Ischaemic stroke            |       |              |                                                       |                              |
| Meat eaters <sup>3</sup>    | 340   | 438,418      | Reference                                             | 0.36                         |
| Fish eaters <sup>3</sup>    | 62    | 132,040      | 1.05 (0.80 to 1.39)                                   |                              |
| Vegetarians                 | 98    | 246,534      | 1.07 (0.84 to 1.36)                                   |                              |
| Vegans                      | 19    | 31,848       | 1.54 (0.95 to 2.48)                                   |                              |
| Haemorrhagic stroke         |       |              |                                                       |                              |
| Meat eaters <sup>3</sup>    | 173   | 438,418      | Reference                                             | 0.07                         |
| Fish eaters <sup>3</sup>    | 38    | 132,040      | 1.12 (0.78 to 1.61)                                   |                              |
| Vegetarians                 | 81    | 246,534      | 1.48 (1.11 to 1.97)                                   |                              |
| Vegans                      | 8     | 31,848       | 1.09 (0.53 to 2.26)                                   |                              |
| Total stroke                |       |              |                                                       |                              |
| Meat eaters <sup>3</sup>    | 678   | 438,418      | Reference                                             | 0.10                         |
| Fish eaters <sup>3</sup>    | 136   | 132,040      | 1.14 (0.94 to 1.38)                                   |                              |
| Vegetarians                 | 223   | 246,534      | 1.17 (1.00 to 1.38)                                   |                              |
| Vegans                      | 35    | 31,848       | 1.35 (0.95 to 1.92)                                   |                              |

<sup>1</sup> All analyses included age as the underlying time variable, and were stratified by sex, method of recruitment (general practice or postal), and region (7 categories), and adjusted for year of recruitment (per year), education (no qualifications, basic secondary [e.g. O level], higher secondary [e.g. A level], degree, unknown), Townsend deprivation index (quartiles, unknown), smoking (never, former, light, heavy, unknown), alcohol consumption (<1g, 1-7g, 8-15g, 16+ g/day), physical activity (inactive, low activity, moderately active, very active, unknown), dietary supplement use (no, yes, unknown), and oral contraceptive (no, yes, unknown) and hormone replacement therapy use (no, yes, unknown) in women.

<sup>2</sup> P-heterogeneity represents significance of heterogeneity in risk between diet groups based on likelihood ratio tests.

<sup>3</sup> Meat eaters were participants who reported eating meat, regardless of whether they ate fish, dairy, or eggs; fish eaters were participants who did not eat meat but did eat fish.

**Supplementary table 4.** Prospective associations between diet groups and risk of cardiovascular diseases in EPIC-Oxford, further adjusted for potential mediators of the associations, and possible relevant dietary factors (n =48 188).

| Outcome and diet groups <sup>1</sup> | Hazard ratios (95% confidence intervals) with additional adjustment for <sup>1</sup> |                                            |                              |                              |                                      |                                         |                            |                           |
|--------------------------------------|--------------------------------------------------------------------------------------|--------------------------------------------|------------------------------|------------------------------|--------------------------------------|-----------------------------------------|----------------------------|---------------------------|
|                                      | Self-reported prior high blood pressure                                              | Self-reported prior high blood cholesterol | Self-reported prior diabetes | Body mass index <sup>4</sup> | All potential mediators <sup>5</sup> | Fruit and vegetable intake <sup>6</sup> | Dietary fibre <sup>6</sup> | Total energy <sup>6</sup> |
| <b>Ischaemic heart disease</b>       |                                                                                      |                                            |                              |                              |                                      |                                         |                            |                           |
| Meat eaters <sup>2</sup>             | Reference                                                                            | Reference                                  | Reference                    | Reference                    | Reference                            | Reference                               | Reference                  | Reference                 |
| Fish eaters <sup>2</sup>             | 0.90 (0.79 to 1.02)                                                                  | 0.89 (0.78 to 1.00)                        | 0.88 (0.78 to 1.00)          | 0.93 (0.82 to 1.05)          | 0.97 (0.85 to 1.10)                  | 0.87 (0.77 to 0.99)                     | 0.88 (0.78 to 1.00)        | 0.87 (0.77 to 0.99)       |
| Vegetarians <sup>2</sup>             | 0.81 (0.73 to 0.90)                                                                  | 0.80 (0.72 to 0.89)                        | 0.80 (0.72 to 0.89)          | 0.83 (0.75 to 0.92)          | 0.90 (0.81 to 1.00)                  | 0.78 (0.70 to 0.87)                     | 0.79 (0.71 to 0.88)        | 0.78 (0.70 to 0.86)       |
| P-heterogeneity <sup>3</sup>         | <0.001                                                                               | <0.001                                     | <0.001                       | 0.003                        | 0.16                                 | <0.001                                  | <0.001                     | <0.001                    |
| <b>Total stroke</b>                  |                                                                                      |                                            |                              |                              |                                      |                                         |                            |                           |
| Meat eaters <sup>2</sup>             | Reference                                                                            | Reference                                  | Reference                    | Reference                    | Reference                            | Reference                               | Reference                  | Reference                 |
| Fish eaters <sup>2</sup>             | 1.16 (0.96 to 1.41)                                                                  | 1.13 (0.94 to 1.37)                        | 1.14 (0.95 to 1.38)          | 1.15 (0.95 to 1.39)          | 1.17 (0.96 to 1.41)                  | 1.13 (0.93 to 1.37)                     | 1.14 (0.94 to 1.38)        | 1.14 (0.94 to 1.38)       |
| Vegetarians <sup>2</sup>             | 1.24 (1.06 to 1.45)                                                                  | 1.19 (1.02 to 1.39)                        | 1.21 (1.03 to 1.41)          | 1.21 (1.03 to 1.42)          | 1.25 (1.06 to 1.47)                  | 1.18 (1.01 to 1.38)                     | 1.19 (1.02 to 1.40)        | 1.20 (1.02 to 1.40)       |
| P-heterogeneity <sup>3</sup>         | 0.02                                                                                 | 0.07                                       | 0.04                         | 0.04                         | 0.02                                 | 0.09                                    | 0.08                       | 0.06                      |

<sup>1</sup> Total analyses time was 836 979 person-years for IHD and 848 840 person-years for total stroke. All analyses included age as the underlying time variable, and were stratified by sex, method of recruitment (general practice or postal), and region (7 categories), and adjusted for year of recruitment (per year), education (no qualifications, basic secondary [e.g. O level], higher secondary [e.g. A level], degree, unknown), Townsend deprivation index (quartiles, unknown), smoking (never, former, light, heavy, unknown), alcohol consumption(<1g, 1-7g, 8-15g, 16+ g/day), physical activity (inactive, low activity, moderately active, very active, unknown), dietary supplement use (no, yes, unknown), and oral contraceptive and hormone replacement therapy use in women.

<sup>2</sup> Meat eaters were participants who reported eating meat, regardless of whether they ate fish, dairy, or eggs; fish eaters were participants who did not eat meat but did eat fish; and vegetarians included vegans.

<sup>3</sup> P-heterogeneity represents significance of heterogeneity in risk between diet groups based on Wald tests.

<sup>4</sup> Body mass index was adjusted for categorically (<20, 20-22.5, 22.5-25, 25-27.5, 27.5+ kg/m<sup>2</sup>, unknown).

<sup>5</sup> All potential mediators included self-reported prior high blood cholesterol, self-reported prior high blood pressure, self-reported prior diabetes, and body mass index.

<sup>6</sup> Fruit and vegetable intake, total fibre, and total energy were adjusted for continuously.

**Supplementary table 5:** Sensitivity analyses on prospective association between diet group and risk of ischaemic heart diseases and stroke.

| Outcome and diet groups            | Hazard ratios (95% confidence intervals) <sup>1</sup>      |                                                                        |                                     |                                 |                                          |                                                              |
|------------------------------------|------------------------------------------------------------|------------------------------------------------------------------------|-------------------------------------|---------------------------------|------------------------------------------|--------------------------------------------------------------|
|                                    | Using baseline dietary and covariate data only<br>N=48 188 | Excluding participants with less than 5 years of follow-up<br>N=46 834 | Postal recruitment only<br>N=43 403 | Censoring at age 70<br>N=45 894 | Setting entry time at age 70<br>N=13 975 | Multiple imputation for covariates (10 datasets)<br>N=48 188 |
| <b>Acute myocardial infarction</b> |                                                            |                                                                        |                                     |                                 |                                          |                                                              |
| Meat eaters <sup>2</sup>           | Reference                                                  | Reference                                                              | Reference                           | Reference                       | Reference                                | Reference                                                    |
| Fish eaters <sup>2</sup>           | 1.01 (0.79 to 1.28)                                        | 0.99 (0.76 to 1.28)                                                    | 0.97 (0.76 to 1.24)                 | 1.07 (0.76 to 1.51)             | 0.93 (0.67 to 1.30)                      | 0.98 (0.77 to 1.25)                                          |
| Vegetarians <sup>2</sup>           | 0.91 (0.75 to 1.11)                                        | 0.90 (0.73 to 1.12)                                                    | 0.89 (0.73 to 1.09)                 | 0.81 (0.60 to 1.09)             | 0.91 (0.69 to 1.19)                      | 0.89 (0.73 to 1.09)                                          |
| P-heterogeneity <sup>3</sup>       | 0.61                                                       | 0.65                                                                   | 0.54                                | 0.27                            | 0.75                                     | 0.51                                                         |
| <b>Ischaemic heart disease</b>     |                                                            |                                                                        |                                     |                                 |                                          |                                                              |
| Meat eaters <sup>2</sup>           | Reference                                                  | Reference                                                              | Reference                           | Reference                       | Reference                                | Reference                                                    |
| Fish eaters <sup>2</sup>           | 0.90 (0.79 to 1.02)                                        | 0.85 (0.74 to 0.98)                                                    | 0.85 (0.75 to 0.97)                 | 0.81 (0.68 to 0.98)             | 0.93 (0.78 to 1.10)                      | 0.87 (0.77 to 0.99)                                          |
| Vegetarians <sup>2</sup>           | 0.79 (0.71 to 0.88)                                        | 0.80 (0.72 to 0.90)                                                    | 0.77 (0.69 to 0.86)                 | 0.75 (0.65 to 0.87)             | 0.75 (0.65 to 0.87)                      | 0.78 (0.70 to 0.87)                                          |
| P-heterogeneity <sup>3</sup>       | <0.001                                                     | <0.001                                                                 | <0.001                              | <0.001                          | <0.001                                   | <0.001                                                       |
| <b>Ischaemic stroke</b>            |                                                            |                                                                        |                                     |                                 |                                          |                                                              |
| Meat eaters <sup>2</sup>           | Reference                                                  | Reference                                                              | Reference                           | Reference                       | Reference                                | Reference                                                    |
| Fish eaters <sup>2</sup>           | 1.06 (0.80 to 1.40)                                        | 1.05 (0.79 to 1.40)                                                    | 1.05 (0.79 to 1.39)                 | 1.35 (0.86 to 2.14)             | 0.94 (0.66 to 1.34)                      | 1.06 (0.80 to 1.40)                                          |
| Vegetarians <sup>2</sup>           | 1.16 (0.93 to 1.45)                                        | 1.08 (0.85 to 1.37)                                                    | 1.12 (0.89 to 1.41)                 | 1.46 (1.00 to 2.14)             | 0.93 (0.69 to 1.24)                      | 1.13 (0.90 to 1.41)                                          |
| P-heterogeneity <sup>3</sup>       | 0.44                                                       | 0.80                                                                   | 0.61                                | 0.12                            | 0.85                                     | 0.58                                                         |
| <b>Haemorrhagic stroke</b>         |                                                            |                                                                        |                                     |                                 |                                          |                                                              |
| Meat eaters <sup>2</sup>           | Reference                                                  | Reference                                                              | Reference                           | Reference                       | Reference                                | Reference                                                    |
| Fish eaters <sup>2</sup>           | 1.18 (0.82 to 1.68)                                        | 1.03 (0.68 to 1.55)                                                    | 1.12 (0.78 to 1.62)                 | 1.08 (0.67 to 1.73)             | 1.10 (0.61 to 1.96)                      | 1.11 (0.77 to 1.60)                                          |
| Vegetarians <sup>2</sup>           | 1.33 (1.00 to 1.77)                                        | 1.52 (1.12 to 2.06)                                                    | 1.46 (1.10 to 1.94)                 | 1.16 (0.79 to 1.69)             | 1.75 (1.15 to 2.67)                      | 1.43 (1.08 to 1.89)                                          |
| P-heterogeneity <sup>3</sup>       | 0.14                                                       | 0.02                                                                   | 0.03                                | 0.75                            | 0.03                                     | 0.046                                                        |
| <b>Total stroke</b>                |                                                            |                                                                        |                                     |                                 |                                          |                                                              |
| Meat eaters <sup>2</sup>           | Reference                                                  | Reference                                                              | Reference                           | Reference                       | Reference                                | Reference                                                    |
| Fish eaters <sup>2</sup>           | 1.19 (0.99 to 1.44)                                        | 1.06 (0.86 to 1.31)                                                    | 1.13 (0.93 to 1.37)                 | 1.30 (0.97 to 1.76)             | 1.04 (0.81 to 1.33)                      | 1.14 (0.94 to 1.38)                                          |
| Vegetarians <sup>2</sup>           | 1.19 (1.02 to 1.39)                                        | 1.19 (1.00 to 1.41)                                                    | 1.20 (1.02 to 1.40)                 | 1.27 (0.99 to 1.64)             | 1.07 (0.88 to 1.31)                      | 1.20 (1.02 to 1.40)                                          |
| P-heterogeneity <sup>3</sup>       | 0.04                                                       | 0.14                                                                   | 0.06                                | 0.09                            | 0.78                                     | 0.06                                                         |

<sup>1</sup> All analyses included age as the underlying time variable, and were stratified by sex, method of recruitment (general practice or postal), and region (7 categories), and adjusted for year of recruitment (per year), education (no qualifications, basic secondary [e.g. O level], higher secondary [e.g. A level], degree, unknown), Townsend deprivation index (quartiles, unknown), smoking (never, former, light, heavy, unknown), alcohol consumption (<1g, 1-7g, 8-15g, 16+ g/day), physical activity (inactive, low activity, moderately active, very active, unknown), dietary supplement use (no, yes, unknown), and oral contraceptive and hormone replacement therapy use in women. Total N reported for each sensitivity analysis was based on N in the analyses for ischaemic heart disease if numbers varied.

<sup>2</sup> Meat eaters were participants who reported eating meat, regardless of whether they ate fish, dairy, or eggs; fish eaters were participants who did not eat meat but did eat fish; and vegetarians included vegans.

<sup>3</sup> P-heterogeneity represents significance of heterogeneity in risk between diet groups based on Wald tests.

**Supplementary table 6:** Risk of ischaemic heart disease by subgroups in different diet groups in EPIC-Oxford.

|                                             | Hazard ratios (95% confidence intervals) <sup>1</sup> |                             |                     | Test of difference between subgroups <sup>6</sup> |
|---------------------------------------------|-------------------------------------------------------|-----------------------------|---------------------|---------------------------------------------------|
|                                             | Subgroups of variable                                 |                             |                     |                                                   |
| <b>Sex</b>                                  | <b>Men</b>                                            | <b>Women</b>                |                     |                                                   |
| N cases                                     | 1176                                                  | 1644                        |                     |                                                   |
| Meat eaters <sup>2</sup>                    | Reference                                             | Reference                   |                     |                                                   |
| Fish eaters <sup>2</sup>                    | 0.78 (0.62 to 0.98)                                   | 0.92 (0.79 to 1.07)         |                     | $\chi^2=2.71$                                     |
| Vegetarians <sup>2</sup>                    | 0.77 (0.66 to 0.91)                                   | 0.78 (0.68 to 0.90)         |                     | p=0.26                                            |
| P-heterogeneity <sup>3</sup>                | P=0.002                                               | p=0.003                     |                     |                                                   |
| <b>Age at recruitment</b>                   | <b>&lt;60 years</b>                                   | <b>≥60 years</b>            |                     |                                                   |
| N cases                                     | 1367                                                  | 1453                        |                     |                                                   |
| Meat eaters <sup>2</sup>                    | Reference                                             | Reference                   |                     |                                                   |
| Fish eaters <sup>2</sup>                    | 0.75 (0.62 to 0.90)                                   | 1.03 (0.86 to 1.22)         |                     | $\chi^2=7.47$                                     |
| Vegetarians <sup>2</sup>                    | 0.73 (0.63 to 0.85)                                   | 0.83 (0.71 to 0.97)         |                     | p=0.02                                            |
| P-heterogeneity <sup>3</sup>                | p<0.001                                               | p=0.04                      |                     |                                                   |
| <b>Body mass index</b>                      | <b>&lt;25 kg/m<sup>2</sup></b>                        | <b>≥25 kg/m<sup>2</sup></b> |                     |                                                   |
| N cases                                     | 1454                                                  | 1262                        |                     |                                                   |
| Meat eaters <sup>2</sup>                    | Reference                                             | Reference                   |                     |                                                   |
| Fish eaters <sup>2</sup>                    | 0.95 (0.81 to 1.12)                                   | 0.93 (0.76 to 1.14)         |                     | $\chi^2=1.83$                                     |
| Vegetarians <sup>2</sup>                    | 0.91 (0.79 to 1.04)                                   | 0.72 (0.60 to 0.87)         |                     | p=0.40                                            |
| P-heterogeneity <sup>3</sup>                | p=0.35                                                | p=0.002                     |                     |                                                   |
| <b>Smoking status</b>                       | <b>Never</b>                                          | <b>Former</b>               | <b>Current</b>      |                                                   |
| N cases                                     | 1407                                                  | 1062                        | 335                 |                                                   |
| Meat eaters <sup>2</sup>                    | Reference                                             | Reference                   | Reference           |                                                   |
| Fish eaters <sup>2</sup>                    | 0.87 (0.73 to 1.04)                                   | 0.90 (0.73 to 1.10)         | 0.79 (0.53 to 1.19) | $\chi^2=0.36$                                     |
| Vegetarians <sup>2</sup>                    | 0.78 (0.67 to 0.90)                                   | 0.79 (0.67 to 0.94)         | 0.67 (0.47 to 0.97) | p=0.99                                            |
| P-heterogeneity <sup>3</sup>                | p=0.002                                               | p=0.03                      | p=0.04              |                                                   |
| <b>Presence of risk factors<sup>4</sup></b> | <b>No</b>                                             | <b>Yes</b>                  |                     |                                                   |
| N cases                                     | 1833                                                  | 965                         |                     |                                                   |
| Meat eaters <sup>2</sup>                    | Reference                                             | Reference                   |                     |                                                   |
| Fish eaters <sup>2</sup>                    | 0.88 (0.75 to 1.02)                                   | 1.02 (0.81 to 1.27)         |                     | $\chi^2=4.27$                                     |
| Vegetarians <sup>2</sup>                    | 0.84 (0.74 to 0.95)                                   | 0.81 (0.66 to 0.99)         |                     | P=0.12                                            |
| P-heterogeneity <sup>3</sup>                | p=0.01                                                | p=0.12                      |                     |                                                   |
| <b>Receiving any treatment<sup>5</sup></b>  | <b>No</b>                                             | <b>Yes</b>                  |                     |                                                   |
| N cases                                     | 1558                                                  | 1223                        |                     |                                                   |
| Meat eaters <sup>2</sup>                    | Reference                                             | Reference                   |                     |                                                   |
| Fish eaters <sup>2</sup>                    | 0.86 (0.73 to 1.02)                                   | 0.94 (0.77 to 1.15)         |                     |                                                   |
| Vegetarians <sup>2</sup>                    | 0.78 (0.68 to 0.89)                                   | 0.84 (0.70 to 0.99)         |                     | $\chi^2=1.07$                                     |
| P-heterogeneity <sup>3</sup>                | P<0.001                                               | p=0.13                      |                     | P=0.59                                            |

<sup>1</sup> All analyses included age as the underlying time variable, and were stratified by sex, method of recruitment (general practice or postal), and region (7 categories), and adjusted for year of recruitment (per year), education (no qualifications, basic secondary [e.g. O level], higher secondary [e.g. A level], degree, unknown), Townsend deprivation index (quartiles, unknown), smoking (never, former, light, heavy, unknown), alcohol consumption (<1g, 1-7g, 8-15g, 16+ g/day), physical activity (inactive, low activity, moderately active, very active, unknown), dietary supplement use (no, yes, unknown), and oral contraceptive and hormone replacement therapy use in women.

<sup>2</sup> Meat eaters were participants who reported eating meat, regardless of whether they ate fish, dairy, or eggs; fish eaters were participants who did not eat meat but did eat fish; and vegetarians included vegans.

<sup>3</sup> P-heterogeneity represents significance of heterogeneity in risk between diet groups based on Wald tests.

<sup>4</sup> Presence of one or more of self-reported prior high blood pressure, high blood cholesterol, or diabetes.

<sup>5</sup> Based on responses to the question: "Are you receiving long-term treatment for any illness or condition?"

<sup>6</sup> Test of interaction by sex, age at recruitment, body mass index, smoking, and presence of risk factors were performed by adding appropriate interaction terms to the Cox models, and testing for statistical significance of interaction across strata using likelihood ratio tests.

**Supplementary table 7:** Risk of stroke by subgroups in different diet groups in EPIC-Oxford.

|                                             | Hazard ratios (95% confidence intervals) <sup>1</sup> |                             |                     | Test of difference between subgroups <sup>6</sup> |
|---------------------------------------------|-------------------------------------------------------|-----------------------------|---------------------|---------------------------------------------------|
|                                             | Subgroups of variable                                 |                             |                     |                                                   |
| <b>Sex</b>                                  | <b>Men</b>                                            | <b>Women</b>                |                     |                                                   |
| N cases                                     | 304                                                   | 768                         |                     |                                                   |
| Meat eaters <sup>2</sup>                    | Reference                                             | Reference                   |                     |                                                   |
| Fish eaters <sup>2</sup>                    | 1.10 (0.73 to 1.65)                                   | 1.15 (0.93 to 1.43)         |                     | χ <sup>2</sup> =2.81                              |
| Vegetarians <sup>2</sup>                    | 0.99 (0.73 to 1.34)                                   | 1.28 (1.07 to 1.53)         |                     | p=0.25                                            |
| P-heterogeneity <sup>3</sup>                | p=0.88                                                | p=0.03                      |                     |                                                   |
| <b>Age at recruitment</b>                   | <b>&lt;60 years</b>                                   | <b>≥60 years</b>            |                     |                                                   |
| N cases                                     | 405                                                   | 667                         |                     |                                                   |
| Meat eaters <sup>2</sup>                    | Reference                                             | Reference                   |                     |                                                   |
| Fish eaters <sup>2</sup>                    | 1.13 (0.84 to 1.52)                                   | 1.14 (0.89 to 1.46)         |                     | χ <sup>2</sup> =0.05                              |
| Vegetarians <sup>2</sup>                    | 1.19 (0.93 to 1.52)                                   | 1.20 (0.98 to 1.47)         |                     | p=0.98                                            |
| P-heterogeneity <sup>3</sup>                | p=0.34                                                | p=0.17                      |                     |                                                   |
| <b>Body mass index</b>                      | <b>&lt;25 kg/m<sup>2</sup></b>                        | <b>≥25 kg/m<sup>2</sup></b> |                     |                                                   |
| N cases                                     | 659                                                   | 369                         |                     |                                                   |
| Meat eaters <sup>2</sup>                    | Reference                                             | Reference                   |                     |                                                   |
| Fish eaters <sup>2</sup>                    | 1.17 (0.93 to 1.47)                                   | 1.20 (0.83 to 1.72)         |                     | χ <sup>2</sup> =0.96                              |
| Vegetarians <sup>2</sup>                    | 1.16 (0.96 to 1.41)                                   | 1.29 (0.96 to 1.73)         |                     | P=0.62                                            |
| P-heterogeneity <sup>3</sup>                | p=0.20                                                | p=0.19                      |                     |                                                   |
| <b>Smoking status</b>                       | <b>Never</b>                                          | <b>Former</b>               | <b>Current</b>      |                                                   |
| N cases                                     | 597                                                   | 377                         | 90                  |                                                   |
| Meat eaters <sup>2</sup>                    | Reference                                             | Reference                   | Reference           |                                                   |
| Fish eaters <sup>2</sup>                    | 1.19 (0.92 to 1.54)                                   | 1.01 (0.73 to 1.40)         | 1.33 (0.69 to 2.55) | χ <sup>2</sup> =2.91                              |
| Vegetarians <sup>2</sup>                    | 1.19 (0.96 to 1.47)                                   | 1.24 (0.96 to 1.61)         | 1.27 (0.71 to 2.28) | P=0.57                                            |
| P-heterogeneity <sup>3</sup>                | p=0.17                                                | p=0.25                      | p=0.59              |                                                   |
| <b>Presence of risk factors<sup>4</sup></b> | <b>No</b>                                             | <b>Yes</b>                  |                     |                                                   |
| N cases                                     | 740                                                   | 322                         |                     |                                                   |
| Meat eaters <sup>2</sup>                    | Reference                                             | Reference                   |                     |                                                   |
| Fish eaters <sup>2</sup>                    | 1.23 (0.98 to 1.53)                                   | 1.01 (0.68 to 1.49)         |                     | χ <sup>2</sup> =2.59                              |
| Vegetarians <sup>2</sup>                    | 1.20 (1.00 to 1.44)                                   | 1.44 (1.06 to 1.96)         |                     | P=0.27                                            |
| P-heterogeneity <sup>3</sup>                | p=0.07                                                | p=0.06                      |                     |                                                   |
| <b>Receiving any treatment<sup>5</sup></b>  | <b>No</b>                                             | <b>Yes</b>                  |                     |                                                   |
| N cases                                     | 600                                                   | 445                         |                     |                                                   |
| Meat eaters <sup>2</sup>                    | Reference                                             | Reference                   |                     |                                                   |
| Fish eaters <sup>2</sup>                    | 1.22 (0.95 to 1.56)                                   | 1.13 (0.83 to 1.53)         |                     | χ <sup>2</sup> =0.60                              |
| Vegetarians <sup>2</sup>                    | 1.31 (1.07 to 1.60)                                   | 1.17 (0.90 to 1.52)         |                     | P=0.74                                            |
| P-heterogeneity <sup>3</sup>                | p=0.03                                                | p=0.45                      |                     |                                                   |

<sup>1</sup> All analyses included age as the underlying time variable, and were stratified by sex, method of recruitment (general practice or postal), and region (7 categories), and adjusted for year of recruitment (per year), education (no qualifications, basic secondary [e.g. O level], higher secondary [e.g. A level], degree, unknown), Townsend deprivation index (quartiles, unknown), smoking (never, former, light, heavy, unknown), alcohol consumption (<1g, 1-7g, 8-15g, 16+ g/day), physical activity (inactive, low activity, moderately active, very active, unknown), dietary supplement use (no, yes, unknown), and oral contraceptive and hormone replacement therapy use in women.

<sup>2</sup> Meat eaters were participants who reported eating meat, regardless of whether they ate fish, dairy, or eggs; fish eaters were participants who did not eat meat but did eat fish; and vegetarians included vegans.

<sup>3</sup> P-heterogeneity represents significance of heterogeneity in risk between diet groups based on Wald tests.

<sup>4</sup> Presence of one or more of self-reported prior high blood pressure, high blood cholesterol, or diabetes.

<sup>5</sup> Based on responses to the question: "Are you receiving long-term treatment for any illness or condition?"

<sup>6</sup> Test of interaction by sex, age at recruitment, body mass index, smoking, and presence of risk factors were performed by adding appropriate interaction terms to the Cox models, and testing for statistical significance of interaction across strata using likelihood ratio tests.
